# Supplementary material for: Diagnostic and management practices for phenylketonuria in 19 countries of the South and Eastern European Region: survey results
Source: PubMed Central journal article supplement (PMC4724370; doi:10.1007/s00431-015-2622-5), 2015-09-08
Supplement: 431_2015_2622_MOESM1_ESM.pdf [file 431_2015_2622_MOESM1_ESM.pdf]

**Article title:** Diagnostic and management practices for phenylketonuria in 19 countries of the South and Eastern European Region: survey results

**Journal:** European Journal of Pediatrics

**Authors:** Maria Gizewska, Anita MacDonald, Amaya Bélanger-Quintana, Alberto Burlina, Maureen Cleary, Turgay Coşkun, François Feillet, Ania C. Muntau, Friedrich Trefz, Francjan van Spronsen, Nenad Blau

**Corresponding author:** Maria Gizewska, Pomeranian Medical University, Szczecin, Poland,  
maria.gizewska@gmail.com

## Online resource 1

Full questionnaire emailed to health care professionals. Questions marked with \* were mandatory.

# Survey on PKU care in Eastern Europe and neighbouring countries

## 1. General information

**\* a. Please provide the names of all people from your centre taking part in this survey (as you would like the names to appear when published in the acknowledgments):**

Participant 1.

Participant 2.

Participant 3.

**\* b. Participant 1. What is your function? (please select your primary role)**

- Physician
- Paediatrician
- Clinical geneticist
- Metabolic paediatrician
- Adult metabolic doctor
- Gynaecologist/obstetrician (maternal PKU)
- Dietician/Nutritionist
- Dietician, metabolic diseases
- Nurse specialising in PKU
- Psychologist
- Clinical biochemist
- Research scientist
- Other (please specify)

# Survey on PKU care in Eastern Europe and neighbouring countries

## Participant 2. What is your function? (please select your primary role)

- Physician
- Paediatrician
- Clinical geneticist
- Metabolic paediatrician
- Adult metabolic doctor
- Gynaecologist/obstetrician (maternal PKU)
- Dietician/Nutritionist
- Dietician, metabolic diseases
- Nurse specialising in PKU
- Psychologist
- Clinical biochemist
- Research scientist
- Other (please specify)

## Participant 3. What is your function? (please select your primary role)

- Physician
- Paediatrician
- Clinical geneticist
- Metabolic paediatrician
- Adult metabolic doctor
- Gynaecologist/obstetrician (maternal PKU)
- Dietician/Nutritionist
- Dietician, metabolic diseases
- Nurse specialising in PKU
- Psychologist
- Clinical biochemist
- Research scientist
- Other (please specify)

# Survey on PKU care in Eastern Europe and neighbouring countries

## \*c. How many years of experience do you have with PKU diagnosis and treatment?

Participant 1. Number of years:

Participant 2. Number of years:

Participant 3. Number of years:

## \*d. Participant 1. With which group(s) of PKU patients are you involved? (multiple answers possible)

- All patients with PKU
- Newborns, children and teenagers (<18 years of age)
- Adults (≥18 years of age)
- Maternal PKU
- PKU patients with intellectual disability
- Other (please specify)

## Participant 2. With which group(s) of PKU patients are you involved? (multiple answers possible)

- All patients with PKU
- Newborns, children and teenagers (<18 years of age)
- Adults (≥18 years of age)
- Maternal PKU
- PKU patients with intellectual disability
- Other (please specify)

## Participant 3. With which group(s) of PKU patients are you involved? (multiple answers possible)

- All patients with PKU
- Newborns, children and teenagers (<18 years of age)
- Adults (≥18 years of age)
- Maternal PKU
- PKU patients with intellectual disability
- Other (please specify)

# Survey on PKU care in Eastern Europe and neighbouring countries

## e. How many centres or clinics offer a PKU service in your country? (leave blank if you do not know)

Number of centres and clinics:

## Please list centres (and, if known, name of contact person) here:

Centre and Contact:

## f. Approximately how many PKU patients (treated and untreated) are there in your country? (leave blank if you do not know)

Number of patients:

## g. How many PKU patients are currently followed at your clinic/centre? (If you do not know exactly, please provide your best estimate)

Number of patients:

## h. Please approximate the number of PKU patients followed over the course of a typical (i.e. average) year at your clinic/centre, as follows: (leave blank if you do not know)

Number of new patients per year:

Total number of patients per year (including the new patients):

## i. Please approximate the distribution of all PKU patients followed over the course of a typical (i.e. average) year at your clinic/centre, as follows: (leave blank if you do not know)

Percentage of children (<18 years of age):

Percentage of adults (≥18 years of age):

## j. Approximately how many maternal PKU pregnancies are followed over the course of a typical (i.e. average) year at your clinic/centre? (leave blank if you do not know)

Number of patients:

## Survey on PKU care in Eastern Europe and neighbouring countries

**k. Approximately what percentage of PKU patients followed at your centre are lost to follow-up (defined as: patient was not seen for 2 years)? (leave blank if you do not know)**

Percentage of patients:

**l. Approximately what percentage of PKU patients currently followed at your centre were late diagnosed (meaning not as newborns)? (leave blank if you do not know)**

Percentage of patients:

**m. Approximately what is the average distance (km) that PKU patients currently have to travel to your centre? (leave blank if you do not know)**

Number of kilometers:

**n. Approximately how many PKU patients at your centre are followed in another country? (leave blank if you do not know)**

Number of patients:

# Survey on PKU care in Eastern Europe and neighbouring countries

## 2. Screening and confirmatory diagnosis procedures:

### a. Is neonatal screening available in your country?

- Yes  
 No

### If yes, is the programme public or private?

- Public  
 Private  
 Partially public, partially private

### If yes, does it exist at a regional or national level?

- At a regional level:  
 At a national level:

### b. When was neonatal screening implemented? (please provide year as YYYY; eg. 2013)

At a regional level

At a national level

### c. Is neonatal screening mandatory for all newborns in your centre?

- Yes  
 No

If no, what % of all newborns are screened at your centre?

### d. At what age is the heel prick test performed at your centre?

Age (days):

### e. At what age are positively screened newborns seen in the medical service?

Age (days):

### f. What is the blood Phe level cut-off for a positive neonatal screening test in your country?

Cut-off ( $\mu\text{mol/L}$ ):

or Cut-off (mg/dL):

# Survey on PKU care in Eastern Europe and neighbouring countries

## **g. What is the method used to confirm a positive neonatal PKU screening test at your centre? (multiple answers possible)**

- Guthrie method
- Colorimetric method
- MS/MS
- HPLC
- Other (please specify)

## **h. Who contacts parents/patients following a positive neonatal PKU screening test at your centre? (multiple answers possible)**

- Physician
- Paediatrician
- Clinical geneticist
- Metabolic paediatrician
- Dietician/Nutritionist
- Dietician, metabolic diseases
- Nurse specialising in PKU
- Psychologist
- Clinical biochemist
- Research scientist
- Other (please specify)

## **i. What is the method used to contact parents/patients following a positive neonatal PKU screening test at your centre? (multiple answers possible)**

- Telephone
- Email
- Other (please specify)

## **j. Is the confirmatory diagnosis of PKU and introduction of treatment performed for in-patients or out-patients at your centre? (multiple answers possible)**

- In-patients (i.e. patients admitted to the hospital and staying > 24 hours)
- Out-patients (i.e. patients attending a clinic and staying at the hospital < 24 hours)



# Survey on PKU care in Eastern Europe and neighbouring countries

## k. Does your centre routinely perform sapropterin dihydrochloride (BH4) loading tests?

- Yes  
 No

## l. For which patient age groups does your centre perform the BH4 loading test? (multiple answers possible; leave blank if your centre does not perform BH4 loading tests)

- Newborns (0–28 days)  
 Infants (29 days–<1 year of age)  
 Young children (1–4 years of age)  
 Older children (5–10 years of age)  
 Teenagers (11–17 years of age)  
 Adults ( $\geq 18$  years of age)  
 Other (please specify)

## m. If a BH4 test is routinely used, please indicate the dosage:

Dosage mg/kg/day

## n. If a BH4 test is routinely used, please indicate the duration of the test:

- 8 hours  
 24 hours  
 48 hours  
 72 hours  
 7 days  
 30 days  
 Other (please specify)

## o. If your centre performs BH4 loading tests, are they generally done before starting with a low-phenylalanine (Phe) diet?

- Yes  
 No

## p. What reduction in Phe concentration (%) does your centre use to define BH4 responsiveness?

Phe concentration  
reduction (%):

## Survey on PKU care in Eastern Europe and neighbouring countries

**q. What percentage of patients at your centre are BH4 responders? (leave blank if you do not know)**

Patients (%):

**r. Does your centre routinely perform pterins analysis?**

- Yes
- No

**If yes, what is the method used for pterins analysis? (multiple answers possible)**

- in urine
- in dry blood spot

**s. Does your centre routinely perform DHPR activity analysis?**

- Yes
- No

**t. Does your centre routinely perform genotype analysis?**

- Yes
- No

**If yes, would the information be included in the BIOPKU database ([www.biopku.org](http://www.biopku.org))?**

- Yes
- No
- I am not aware of this database

## 3. Treatment practices

### a. What treatment options are available in your country? (multiple answers possible)

- Low-Phe diet
- BH4
- Large neutral amino acid
- Other (please specify)

### b. What are the blood Phe threshold levels for starting low-Phe diet treatment in each patient group at your centre?

Consistently elevated blood Phe levels of:

Newborns and infants (<1 year of age)

Young children (1–4 years of age)

Older children (5–10 years of age)

Teenagers (11–17 years of age)

Adults (≥18 years of age)

Pregnant women

Specify here if other blood Phe threshold levels are used for each patient group

### c. At what age does your centre introduce low-Phe diet in newly diagnosed newborns?

- <10 days
- 10-15 days
- 16-28 days
- ≥29 days

### d. Does your centre allow breastfeeding in neonates and infants with PKU?

- Yes
- No

# Survey on PKU care in Eastern Europe and neighbouring countries

## e. Life-long concept of PKU treatment is:

- Used at all PKU centres in your country
- Used at your centre, but not necessarily at all PKU centres in your country
- Not used at your centre, but might be available at other PKU centres in your country
- Not used anywhere in your country

## f. Treatment with low-Phe diet to prevent maternal PKU syndrome is:

- Available at all PKU centres in your country
- Available at your centre, but not necessarily at all PKU centres in your country
- Not available at your centre, but might be available at other PKU centres in your country
- Not available anywhere in your country

## g. Treatment with low-Phe diet for untreated or late-treated PKU patients is:

- Available at all PKU centres in your country
- Available at your centre, but not necessarily at all PKU centres in your country
- Not available at your centre, but might be available at other PKU centres in your country
- Not available anywhere in your country

## h. BH4 treatment is:

- Available at all PKU centres in your country
- Available at your centre, but not necessarily at all PKU centres in your country
- Not available at your centre, but might be available at other PKU centres in your country
- Not available anywhere in your country

## i. For patients with classical PKU, what dose of total protein (g/kg/day) does your centre prescribe for the following age groups? (Please specify the min-max range using g/kg/day, using a decimal point if required)

|                                                  |                      |
|--------------------------------------------------|----------------------|
| Newborns and infants (<1 year of age) (g/kg/day) | <input type="text"/> |
| Young children (1–4 years of age) (g/kg/day)     | <input type="text"/> |
| Older children (5–10 years of age) (g/kg/day)    | <input type="text"/> |
| Teenagers (11–17 years of age) (g/kg/day)        | <input type="text"/> |
| Adults (≥18 years of age) (g/kg/day)             | <input type="text"/> |

## Survey on PKU care in Eastern Europe and neighbouring countries

**j. Do PKU patients at your centre take any of the additional supplements (besides in Phe-free protein substitutes) on the following list? (Multiple answers are possible; if the answer is no, leave blank)**

- Long chain polyunsaturated fatty acids
- Vitamins and minerals
- Carnitine
- Antioxidants
- Cod liver oil
- Other supplements (please specify)

# Survey on PKU care in Eastern Europe and neighbouring countries

## 4. Follow-up

### a. Does your centre follow a specific "follow-up protocol" for PKU patients?

- Yes  
 No

### b. What are the blood Phe target ranges for each PKU patient group at your centre? (Please specify the min–max range using either $\mu\text{mol/L}$ or $\text{mg/dL}$ , and use a decimal point if required)

|                                                                  |                      |
|------------------------------------------------------------------|----------------------|
| Newborns and infants (<1 year of age), range $\mu\text{mol/L}$ : | <input type="text"/> |
| <b>or</b> range $\text{mg/dL}$ :                                 | <input type="text"/> |
| Young children (1–4 years of age), range $\mu\text{mol/L}$ :     | <input type="text"/> |
| <b>or</b> range $\text{mg/dL}$ :                                 | <input type="text"/> |
| Older children (5–10 years of age), range $\mu\text{mol/L}$ :    | <input type="text"/> |
| <b>or</b> range $\text{mg/dL}$ :                                 | <input type="text"/> |
| Teenagers (11–17 years of age), range $\mu\text{mol/L}$ :        | <input type="text"/> |
| <b>or</b> range $\text{mg/dL}$ :                                 | <input type="text"/> |
| Adults ( $\geq 18$ years of age), range $\mu\text{mol/L}$ :      | <input type="text"/> |
| <b>or</b> range $\text{mg/dL}$ :                                 | <input type="text"/> |
| Maternal PKU, range $\mu\text{mol/L}$ :                          | <input type="text"/> |
| <b>or</b> range $\text{mg/dL}$ :                                 | <input type="text"/> |

### c. How often are Phe levels monitored at your centre in each PKU patient group?

Frequency of monitoring

|                                       |                      |
|---------------------------------------|----------------------|
| Newborns and infants (<1 year of age) | <input type="text"/> |
| Young children (1–4 years of age)     | <input type="text"/> |
| Older children (5–10 years of age)    | <input type="text"/> |
| Teenagers (11–17 years of age)        | <input type="text"/> |
| Adults ( $\geq 18$ years of age)      | <input type="text"/> |
| Maternal PKU                          | <input type="text"/> |

specify here if other frequencies are used for each patient group:

# Survey on PKU care in Eastern Europe and neighbouring countries

## d. Where does your centre collect samples for monitoring Phe levels in treated PKU patients? (multiple answers possible)

- Home
- Outpatient clinic
- Hospital
- Family doctor clinic (general practitioner)

## e. Approximately what is the average return time of routine Phe control results to your patients, after blood sampling?

Number of days:

## f. How do patients at your centre receive results of Phe levels? (multiple answers possible)

- E-mail
- Phone
- Letter
- Clinic visits
- Other (please specify)

## g. When giving the Phe results, who contacts parents/patients to provide advice or make changes to diet or other treatment? (multiple answers possible)

- Physician
- Paediatrician
- Clinical geneticist
- Metabolic paediatrician
- Adult metabolic doctor
- Dietician/Nutritionist
- Dietician, metabolic diseases
- Nurse specialising in PKU
- Psychologist
- Clinical biochemist
- Research scientist
- Other (please specify)

# Survey on PKU care in Eastern Europe and neighbouring countries

## **h. How many clinical evaluations are performed per year in children and non-pregnant adults with PKU?**

|                                       |                      |
|---------------------------------------|----------------------|
| Newborns and infants (<1 year of age) | <input type="text"/> |
| Young children (1–4 years of age)     | <input type="text"/> |
| Older children (5–10 years of age)    | <input type="text"/> |
| Teenagers (11–17 years of age)        | <input type="text"/> |
| Adults (≥18 years of age)             | <input type="text"/> |
| Maternal PKU                          | <input type="text"/> |

## **i. In pregnant women with PKU (maternal PKU), what is the frequency of clinical evaluations per trimester of pregnancy?**

|                  | Once every week       | Once every two weeks  | Once every month      | Other (specify below) |
|------------------|-----------------------|-----------------------|-----------------------|-----------------------|
| First trimester  | <input type="radio"/> | <input type="radio"/> | <input type="radio"/> | <input type="radio"/> |
| Second trimester | <input type="radio"/> | <input type="radio"/> | <input type="radio"/> | <input type="radio"/> |
| Third trimester  | <input type="radio"/> | <input type="radio"/> | <input type="radio"/> | <input type="radio"/> |

Specify here if other frequencies are used in each trimester

## **j. Who cares for PKU patients from the age of 18 years? (multiple answers possible)**

- PKU paediatric clinic
- PKU adult clinic
- Other (please specify)



## 5. Constitution of treatment team

### a. The PKU team at your centre includes which of the following? (multiple answers possible)

- Physicians
- Paediatricians
- Clinical geneticists
- Metabolic paediatricians
- Adult metabolic doctors
- Gynaecologists/obstetricians (maternal PKU)
- Dieticians/Nutritionists
- Dieticians, metabolic diseases
- Nurses specialising in PKU
- Psychologists
- Clinical biochemists
- Research scientists
- Other (please specify)

### b. Do you have a dedicated dietician to care for PKU patients at your centre?

- Yes
- No

### If yes, to what level is your dietician trained?

- General high school education only
- Further education diploma (not university)
- University degree
- Higher degree (Masters or above)

## 6. Existing guidelines and protocols

### a. Are you aware of published guidelines or protocols for PKU diagnosis and treatment?

- Yes  
 No

If yes, which ones are you aware of (please specify)

### b. Which guidelines or protocols for PKU diagnosis and treatment does your centre use? (multiple answers possible)

- Own guidelines/protocols (unpublished)  
 Published guidelines/protocols

### If possible, please provide details (e.g. authors, title, year)

### c. Do you have a local or national PKU patient registry?

- Yes, both national and local registries  
 Yes, national registries only  
 Yes, local registries only  
 No

### d. Are there any organisations (eg. scientific societies, groups of interest, or others) dedicated to professionals involved in PKU treatment in your country?

- Yes  
 No

If yes, please specify the nature of this organisation

### e. Are there any organisations dedicated to PKU patients and their families in your country?

- Yes  
 No

If yes, please specify the nature of this organisation

# Survey on PKU care in Eastern Europe and neighbouring countries

## 7. Service offered to patients: Phe-free protein substitutes and low-p...

**a. How many kinds of Phe-free protein substitutes are available in your country?**

**b. Who contributes to the costs of Phe-free protein substitutes? (multiple answers possible)**

- Government
- Private health insurance
- Parents/patients
- Other (please specify)

**c. How are special dietary products delivered to PKU patients? (multiple answers possible)**

- Low-protein shops
- Home delivery
- Internet
- Other (please specify)

**d. How many pharmaceutical companies supply Phe-free protein substitutes in your country? (leave blank if you do not know)**

**e. How many companies supply low-protein foods in your country? (leave blank if you do not know)**

**f. Who contributes to the cost of special low protein foods (flour, pasta)? (multiple answers possible)**

- Government
- Private health insurance
- Parents/patients
- Other (please specify)

## Survey on PKU care in Eastern Europe and neighbouring countries

### **g. What kind of social support is offered to PKU patients in your country? (multiple answers possible)**

- Disability allowance
- Disability certificate which helps with education, employment, travel expenses
- Dietary allowance to go to summer camps
- Reimbursement of travel expenses
- Home support or compensation to parents for decreasing working hours
- No support available
- Other (please specify)

## Challenges and areas for improvement in PKU care

**What are the main challenges in your country in relation to screening, confirmatory diagnosis and treatment of PKU?**

**What would you like to be improved in your country in terms of PKU care?**
