# Supplementary material for: Diagnostic and management practices for phenylketonuria in 19 countries of the South and Eastern European Region: survey results
Source: Springer Nature journal article supplement (doi:10.1007/s00431-015-2622-5), 2015-09-08
Supplement: MOESM3 [file 8512908]

**Article title:** Diagnostic and management practices for phenylketonuria in 19 countries of the South and Eastern European Region: survey results

**Journal:** European Journal of Pediatrics

**Authors:** Maria Gizewska, Anita MacDonald, Amaya Bélanger-Quintana, Alberto Burlina, Maureen Cleary, Turgay Coşkun, François Feillet, Ania C. Muntau, Friedrich Trefz, Francjan van Spronsen, Nenad Blau

**Corresponding author:** Maria Gizewska, Pomeranian Medical University, Szczecin, Poland,  
maria.gizewska@gmail.com

## Online resource 3

Summary of main challenges in relation to screening, confirmatory diagnosis and treatment of PKU, and areas for improvement in PKU care (N=31)

| <i>Main challenges in screening, confirmatory diagnosis and treatment of PKU<sup>a</sup></i> | <i>Responses % (n)</i> | <i>Areas for improvement in PKU care<sup>a</sup></i>                                                            | <i>Responses % (n)</i> |
|----------------------------------------------------------------------------------------------|------------------------|-----------------------------------------------------------------------------------------------------------------|------------------------|
| Lack of BH4-responsiveness testing/treatment (in all age groups)                             | 12.9% (4)              | Reimbursement for low-protein foods                                                                             | 16.1% (5)              |
| Lack of funds for PKU treatment and management                                               | 9.7% (3)               | Broader range of Phe-free protein substitutes/low-protein foods                                                 | 16.1% (5)              |
| Lack of TMS for diagnosis                                                                    | 6.5% (2)               | Adequate funds for PKU treatment and management                                                                 | 16.1% (5)              |
| Lack of skilled/coordinated treatment team                                                   | 6.5% (2)               | BH4 loading tests/treatment                                                                                     | 12.9% (4)              |
|                                                                                              |                        | Setting up of dedicated specialist team.                                                                        | 12.9% (4)              |
|                                                                                              |                        | Provision of dietician                                                                                          | 12.9% (4)              |
|                                                                                              |                        | Improved diagnostic testing (more methods/improved application)                                                 | 9.7% (3)               |
|                                                                                              |                        | Newborn screening programme (Establishment/increase budget)                                                     | 9.7% (3)               |
|                                                                                              |                        | Closer collaboration between medical service and external companies/organisations (pharmacies/PKU associations) | 9.7% (3)               |
|                                                                                              |                        | Improved social support for patients and their families                                                         | 6.5% (2)               |
| Other <sup>b</sup>                                                                           | 25.8% (8)              | Other <sup>c</sup>                                                                                              | 3.2% (1)               |
| No answer                                                                                    | 48.4% (15)             | No answer                                                                                                       | 41.9% (13)             |

<sup>a</sup>Open answers provided by participants were summarised and grouped and only those challenges/areas for improvement stated in more than 2 questionnaires are included as separate row headers in the table; <sup>b</sup>'Other' included: 'lack of treatment options beyond low-Phe diet', 'lack of all methods for confirmatory diagnosis', 'lack of dietician', 'lack of newborn screening', 'lack of PKU product availability', 'lack of reimbursement for low-protein foods', 'high cost of low-protein foods', 'lack of education'; <sup>c</sup>'other' included: 'Separate care for adult and paediatric patients with PKU' BH4, sapropterin dihydrochloride; Phe, phenylalanine; PKU, phenylketonuria; TMS, tandem mass spectroscopy
